# Supplementary material for: An Effective Primary Head and Neck Squamous Cell Carcinoma In Vitro Model
Source: MDPI journal article supplement (doi:10.3390/cells8060555), 2019-06-07
Supplement: s1 [file s1]

**Table S1: Biological data of patient-derived tumor tissue.**

| Sample # | Cell culture name | Patient Sex | Patient age (years) | Tumor type              | p16 status (pathology) | Differentiation grade | Culture medium used | Cell culture established            |
|----------|-------------------|-------------|---------------------|-------------------------|------------------------|-----------------------|---------------------|-------------------------------------|
| S1       | BI-1              | male        | 82                  | Mucinous adenocarcinoma | not determined         |                       | DMEM                | stroma                              |
| S2       |                   | male        | 78                  | Oropharynx SCC          | positive               | G3                    | DMEM                | none                                |
| S3       | BI-3              | male        | 71                  | Hypopharynx SCC         | positive               | G3                    | DMEM                | stroma                              |
| S4       | BI-4              | male        | 62                  | Larynx SCC              | not determined         | G2                    | DMEM                | stroma                              |
| S5       | BI-5              | female      | 57                  | Oropharynx SCC          | not determined         | G2                    | DMEM                | stroma                              |
| S6       |                   | male        | 71                  | Oropharynx SCC          | not determined         | G2                    | DMEM                | none                                |
| S7       |                   | male        | 85                  | Oropharynx SCC          | positive               | G2                    | DMEM                | none                                |
| S8       |                   | female      | 87                  | Larynx SCC              | not determined         | G2                    | DMEM                | none                                |
| S9       | BI-9              | male        | 53                  | Schwannoma              | not determined         |                       | DMEM                | mesenchymal                         |
| S10      |                   | female      | 53                  | Nasal cavity SCC        | not determined         | G2                    | DMEM                | none                                |
| S11      |                   | male        | 64                  | Oropharynx SCC          | not determined         | G2                    | DMEM                | contaminated                        |
| S12      | BI-12             | male        | 49                  | Tonsil SCC              | positive               | G3                    | CSC                 | epithelial                          |
| S13      |                   | female      | 59                  | Larynx SCC              | not determined         | G2                    | CSC                 | none                                |
| S14      |                   | male        | 76                  | Tonsil SCC              | positive               | G3                    | CSC                 | none                                |
| S15      | BI-15             | female      | 57                  | Oropharynx SCC          | positive               | G3                    | CSC                 | epithelial                          |
| S16      |                   | female      | 55                  | Oropharynx SCC          | negative               | G3                    | CSC                 | contaminated                        |
| S17      |                   | female      | 88                  | Larynx SCC              | not determined         | G2                    | CSC                 | none                                |
| S18      | BI-18             | male        | 77                  | Oropharynx SCC          | negative               | G3                    | DMEM, CSC, and PNEU | epithelial (PNEU)                   |
| S19      |                   | male        | 67                  | Oropharynx SCC          | positive               | G2                    | DMEM and PNEU       | none                                |
| S20      |                   | female      | 74                  | Oropharynx SCC          | not determined         | G2                    | PNEU                | none                                |
| S21      |                   | female      | 47                  | Esthesioneuroblastoma   | not determined         |                       | PNEU                | none                                |
| S22      | BI-22             | male        | 55                  | Oropharynx SCC          | negative               | G3                    | PNEU                | epithelial                          |
| S23      | BI-23             | female      | 88                  | Larynx SCC              | not determined         | G2                    | PNEU                | epithelial                          |
| S24      | BI-24             | male        | 58                  | Oropharynx SCC          | positive               | G2                    | DMEM and PNEU       | stroma (DMEM) and epithelial (PNEU) |
| S25      | BI-25             | male        | 75                  | SCC of ear/skin         | not determined         | G3                    | PNEU                | epithelial                          |
