# Supplementary material for: An Effective Primary Head and Neck Squamous Cell Carcinoma In Vitro Model
Source: MDPI journal article supplement (doi:10.3390/cells8060555), 2019-06-07
Supplement: s1 [file s1]

## Supplementary material

**Figure S1: Primary HNSCC cell culture of patient sample S18 in DMEM-medium containing 10% FBS.**

**Figure S2: Epithelial tumor cells of S4 expanding in PNEU-medium.**

**Figure S3: Figure S3: Marker expression of S12 and S15 cells cultured in three different media.**

**Figure S4: Multinuclear cells co-expressing epithelial and mesenchymal markers detected by indirect immunofluorescence.**

**Figure S5: CK14 and Vimentin (VIM) expression in mixed cell cultures composed of epithelial and mesenchymal populations visualized by indirect immunofluorescence.**

**Figure S6: CK19 and  $\alpha$ -SMA expression in mixed cell cultures composed of epithelial and mesenchymal populations visualized by indirect immunofluorescence.**

**Table S1: Biological data of patient-derived tumor tissue.  
(See separate document)**

### **S18, passage 0**

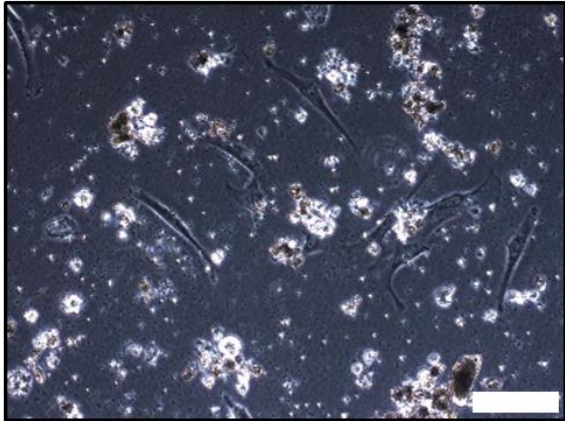

**Figure S1: Primary HNSCC cell culture of patient sample S18 in DMEM-medium containing 10% FBS.** Single fibroblast-like cells of S18 attach to the bottom of the cell culture dish; scale bar = 100  $\mu\text{m}$ .

### **S4, passage 2, PNEU**

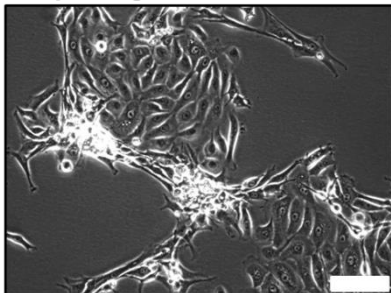

### **S4, passage 3, PNEU**

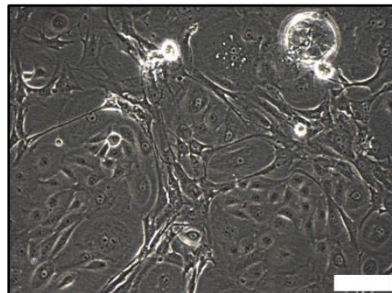

### **S4, passage 4, PNEU**

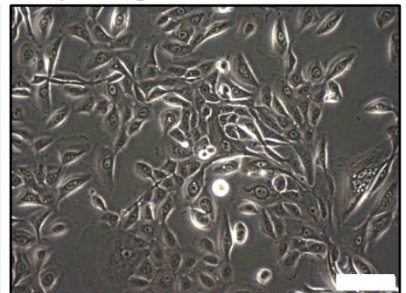

**Figure S2: Epithelial tumor cells of S4 expanding in PNEU-medium.** In contrast to DMEM-medium (see Figure 1), epithelial cells are enriched in PNEU-medium between passages 2 to 4 while fibroblast-like cells are lost; scale bars = 100  $\mu\text{m}$ .

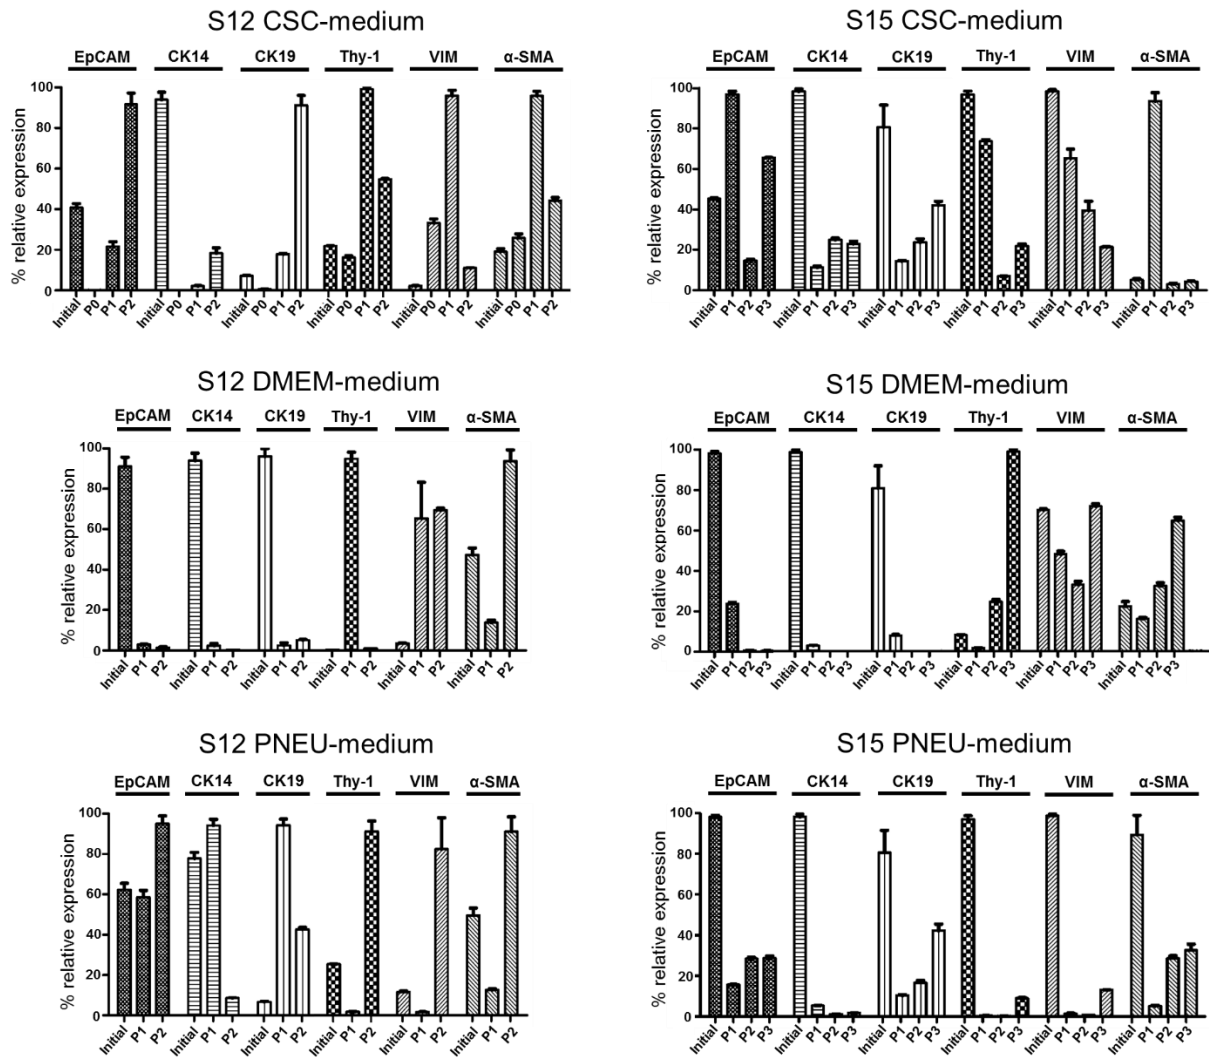

**Figure S3: Marker expression of S12 and S15 cells cultured in three different media.** Epithelial markers EpCAM, CK14, and CK19 and mesenchymal markers Thy-1, Vimentin (VIM), and α-SMA were analyzed by qRT-PCR; P1 = cell culture passage 1; initial = original tumor sample.

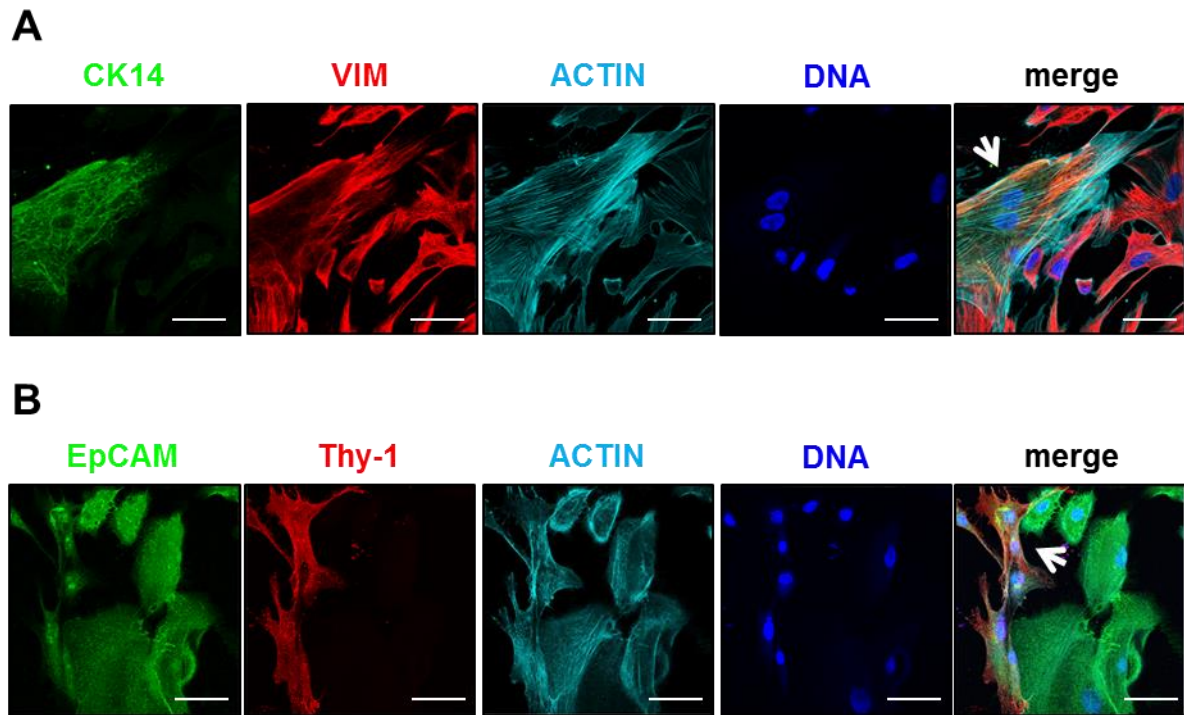

**Figure S4: Multinuclear cells co-expressing epithelial and mesenchymal markers detected by indirect immunofluorescence. (A)** A binuclear cell (arrow) of S22 expresses CK14 and Vimentin (VIM) and shows myofibroblast-like parallel actin fibers. **(B)** A multinuclear cell (arrow) of S4 is positive for EpCAM and Thy-1. Actin was stained using phalloidin to visualize cell morphology; DNA was stained using Hoechst33342; scale bars: 50  $\mu\text{m}$ .

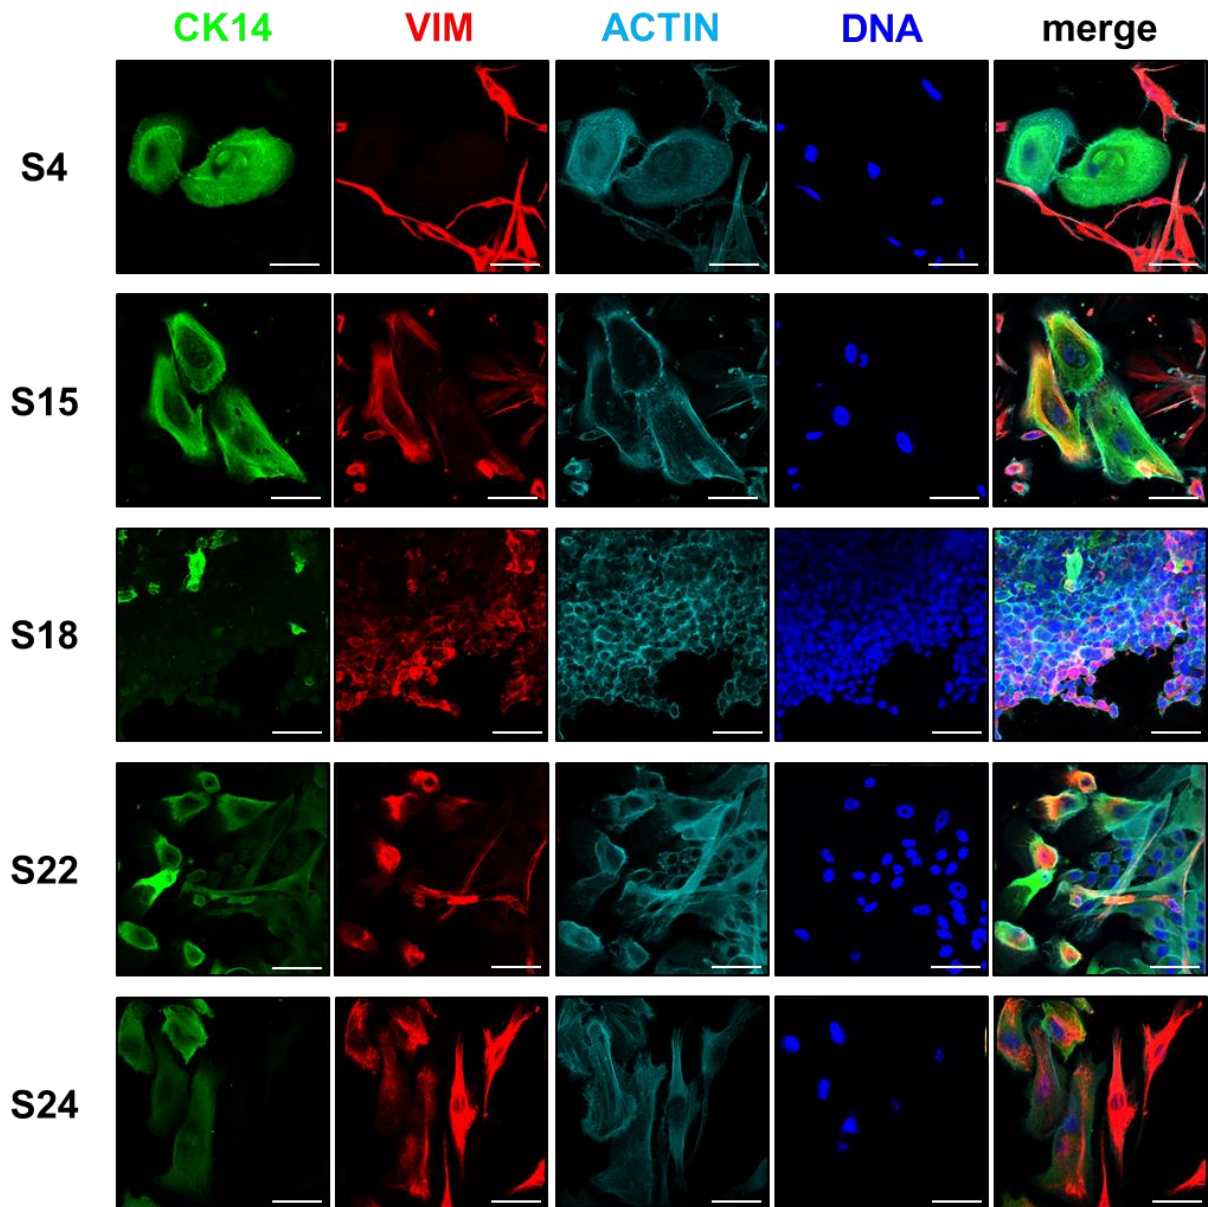

**Figure S5: CK14 and Vimentin (VIM) expression in mixed cell cultures composed of epithelial and mesenchymal populations visualized by indirect immunofluorescence.** CK14 and Vimentin were heterogeneously expressed in both compartments. Epithelial cells of all patients frequently co-expressed both markers, whereas cells with fibroblast-like morphology uniformly expressed Vimentin but were regularly negative for CK14. Only mesenchymal cells of S22 displayed faint CK14 staining. Actin was stained using phalloidin to visualize cell morphology; DNA was stained using Hoechst33342; scale bars: 50  $\mu$ m.



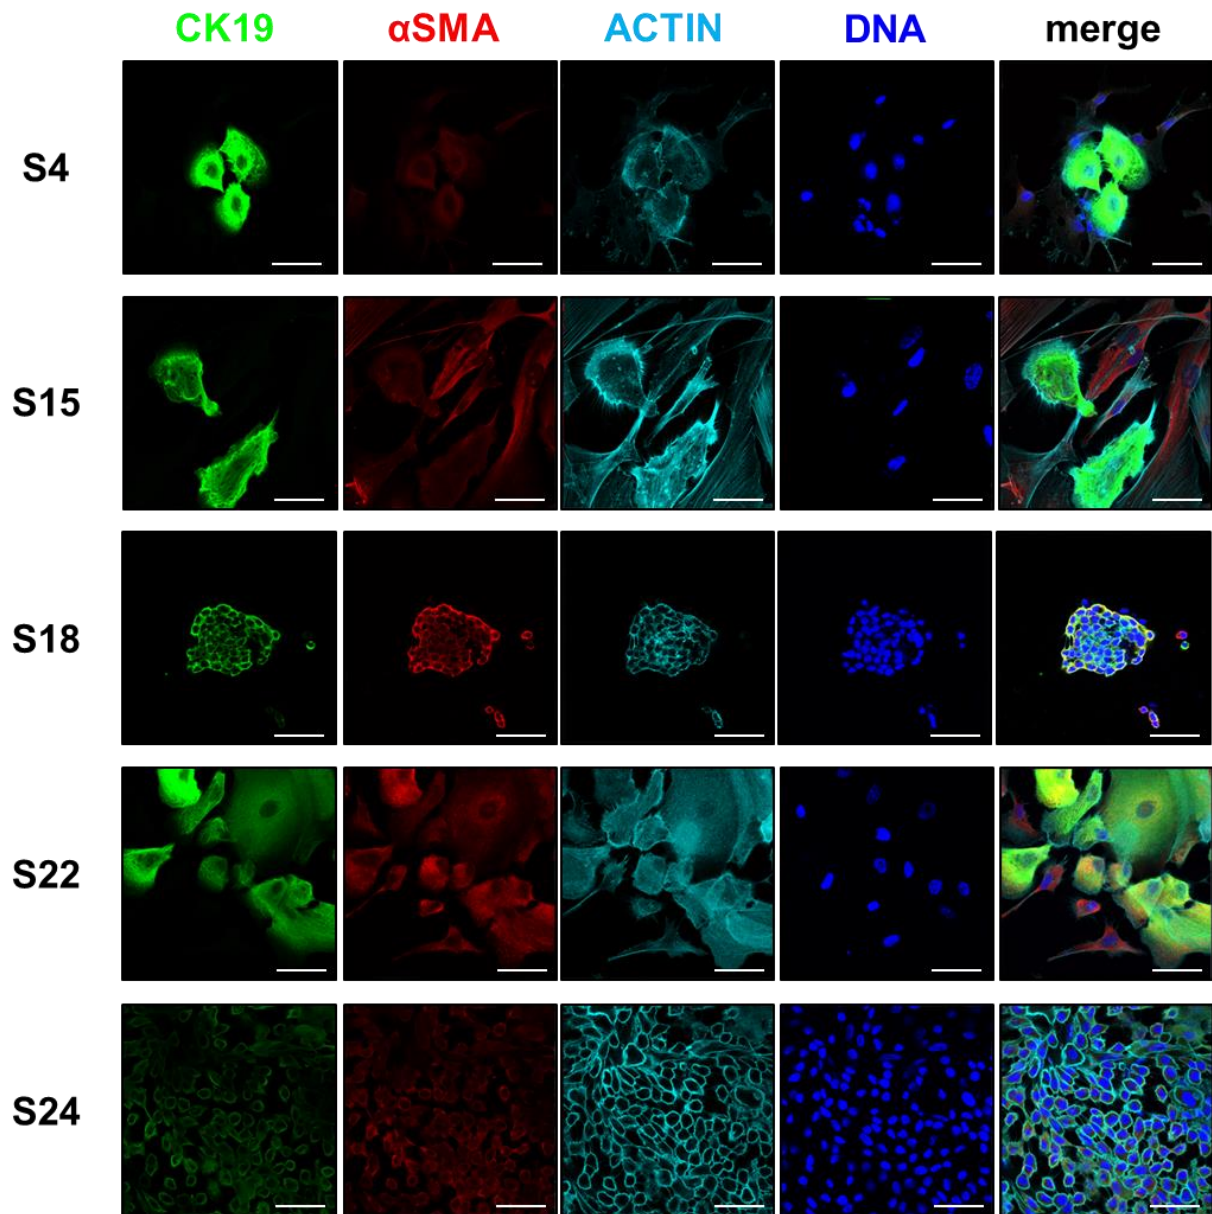

**Figure S6: CK19 and  $\alpha$ -SMA expression in mixed cell cultures composed of epithelial and mesenchymal populations visualized by indirect immunofluorescence.** Epithelial cells uniformly expressed CK19, whereas  $\alpha$ -SMA was detected in a subpopulation at varying intensity. Mesenchymal cells expressed heterogeneous levels of  $\alpha$ -SMA. Mononuclear cells with fibroblast-like morphology showing CK19 expression were not detected. Actin was stained using phalloidin to visualize cell morphology; DNA was stained using Hoechst33342; scale bars: 50  $\mu$ m.
